# Supplementary material for: Fully automated MRI-based convolutional neural network for noninvasive diagnosis of cirrhosis
Source: PubMed Central journal article supplement (PMC11638457; doi:10.1186/s13244-024-01872-9), 2024-12-12
Supplement: 13244_2024_1872_MOESM1_ESM.pdf [file 13244_2024_1872_MOESM1_ESM.pdf]

# Fully automated MRI-based convolutional neural network for noninvasive diagnosis of cirrhosis

## ELECTRONIC SUPPLEMENTARY MATERIAL

### Contents

|                                                                                                                                      |    |
|--------------------------------------------------------------------------------------------------------------------------------------|----|
| Supplementary Material 1: MRI acquisition protocols .....                                                                            | 2  |
| Table S1 MRI sequences and parameters .....                                                                                          | 4  |
| Supplementary Material 2: Assessment of image artifact .....                                                                         | 8  |
| Supplementary Material 3: Image co-registration .....                                                                                | 9  |
| Table S2 The Dice and ASD results of 3D image registration network .....                                                             | 9  |
| Supplementary Material 4: Liver segmentation .....                                                                                   | 10 |
| Figure S1: The one-to-multiple unsupervised domain adaptation (OMUDA) framework.....                                                 | 11 |
| Figure S2: Segmentation results of different methods on the internal testing set .....                                               | 12 |
| Table S3 Quantitative liver segmentation results of OMUDA framework on the internal testing<br>set .....                             | 13 |
| Supplementary Material 5: CNN model training .....                                                                                   | 14 |
| Figure S3 Loss curves of derivation and validation sets of five-fold cross-validation experiments<br>.....                           | 15 |
| Supplementary Material 6: Development of the combined model .....                                                                    | 16 |
| Table S4 Performance of CNN models with different combinations of MRI sequences on the<br>training set .....                         | 17 |
| Table S5 Multicollinearity test based on variance inflation factor .....                                                             | 18 |
| Table S6 Importance score of variables in the combined model .....                                                                   | 19 |
| Figure S4 Receiver operating characteristic curves for diagnosis of cirrhosis on the training set<br>.....                           | 20 |
| Figure S5 Calibration curves and decision curves for diagnosis of cirrhosis on the testing sets .                                    | 21 |
| Table S7 Examples of possible reasons for false positive and false negative cases of the combined<br>model on the testing sets ..... | 22 |

## Supplementary Material 1: MRI acquisition protocols

### Training and internal testing center

All contrast-enhanced MR examinations were performed with one of the following eight types of 3.0 T or 1.5 T MR scanners (Siemens MAGNETOM Skyra; Siemens Avanto; Siemens TrioTim; GE Discovery 750w; GE SIGNA™ Premier; GE SIGNA™ Architect; Phillips Ingenia Elition X; uMR588) using either extracellular contrast agent (ECA-MRI) or gadoxetate disodium (EOB-MRI). All patients were asked to fast for 6-8 hours prior to MR examinations. The liver MRI protocols included (1) in- and opposed-phase T1-weighted imaging; (2) T2-weighted imaging; (3) diffusion-weighted imaging (b values: 0, 50, 500, 800, 1000, and 1200 s/mm<sup>2</sup> [Siemens MAGNETOM Skyra]; 0, 50, 800 s/mm<sup>2</sup> [Siemens Avanto]; 0, 50, 600 s/mm<sup>2</sup> [Siemens TrioTim]; 0, 50, 1000 s/mm<sup>2</sup> [Siemens Avanto; GE SIGNA™ Premier]; 50, 800, 1000, and 1200 s/mm<sup>2</sup> [GE Discovery 750w]; 0, 50, and 1000 s/mm<sup>2</sup> [GE SIGNA™ Architect]; 0, 200, 1000 s/mm<sup>2</sup> [Phillips Ingenia Elition X]; 0, 50, 1000, 1500 s/mm<sup>2</sup> [uMR588]) with apparent diffusion coefficient (ADC) maps reconstructed using the mono-exponential model; and (4) fat-suppressed T1-weighted dynamic phases including the pre-contrast phase, late arterial phase, portal venous phase (60s after the start of contrast media injection), delayed phase (for ECA-MRI, 180s after the start of contrast media injection) or transitional phase (for EOB-MRI, 5min after the start of contrast media injection), and hepatobiliary phase (for EOB-MRI, 20min after the start of contrast media injection). The arterial phase images were acquired with either a bolus-tracking method (acquisition triggered 7s after the arrival of the contrast bolus in the celiac trunk) or a multiple arterial phase (MAP) imaging technique (acquired with an 18s breath-hold 20s after the start of contrast media injection and further reconstructed with a temporal resolution of 3s).

For acquisition of ECA-MRI, 0.1 mmol/kg of extracellular contrast agent, including gadopentetate dimeglumine (Magnevist®; Bayer Schering Pharma AG), gadoterate meglumine (Dotarem®; Guerbet), or gadobenate dimeglumine (MultiHance®; Bracco), was injected at a rate of 2.5 ml/s. For acquisition of EOB-MRI, 0.025 mmol/kg of EOB (Primovist®; Bayer Schering Pharma AG or XianAi®; Chia Tai TianQing Pharmaceutical Co., Ltd) was injected at a rate of 1.0-2.0 ml/s.

### External testing centers

For the external testing centers, five types of MRI scanners (Siemens MAGNETOM Vida 3.0 T, Siemens MAGNETOM Skyra 3.0 T, Siemens MAGNETOM Prisma 3.0 T, Philips Achieva 1.5 T, and uMR780 3.0 T) were used for the acquisition of contrast-enhanced MR images. Both ECA and EOB were used. For the acquisition of ECA-MRI, 0.1 mmol/kg of gadopentetate dimeglumine (Magnevist®; Bayer Schering Pharma AG, Berlin, Germany or SCHERING, Guangzhou, China) or gadoterate meglumine (Dotarem®; Guerbet) was injected at a rate of 2.5 ml/s. For the acquisition of EOB-MRI, Insights Imaging (2024) Zheng T, Zhu Y, Chen Y, et al.

0.025 mmol/kg of EOB (Primovist®; Bayer Schering Pharma AG, Berlin, Germany or XianAi®; Chia Tai TianQing Pharmaceutical Co., Ltd, Jiangsu, China) was injected at a rate of 1.0-2.0 ml/s.

The MRI sequences included (a) T2-weighted imaging; (b) diffusion-weighted imaging (b values: 0, 60, and 800s/mm<sup>2</sup> [Siemens MAGNETOM Vida 3.0 T]; 0, 50, 400, and 800s/mm<sup>2</sup> [Siemens MAGNETOM Skyra 3.0 T]; 0, 20, 50, 100, 150, 200, 600, 1000, 2000, and 3000s/mm<sup>2</sup> [Siemens MAGNETOM Prisma 3.0 T]; 0, 50, and 600s/mm<sup>2</sup> [Philips Achieva 1.5 T]; 0, 50, and 1000s/mm<sup>2</sup> [uMR780 3.0 T] with apparent diffusion coefficient maps reconstructed using the monoexponential model; (c) in- and out-of-phase T1-weighted imaging; and (d) dynamic T1-weighted imaging in the pre-contrast phase, late arterial phase, portal venous phase (60s after the start of contrast media injection), delayed phase (for ECA-MRI, 3min after start of contrast media injection) or transitional phase (for EOB-MRI, 5min after the start of contrast media injection), and hepatobiliary phase (for EOB-MRI, 20min after the start of contrast media injection).

Details of the MRI sequences and parameters are shown in **Table S1**.

**Table S1** MRI sequences and parameters

| Sequence                                                                                                   | T1-weighted IP and OP imaging | Dynamic T1-weighted GRE | T1-3D | T2-weighted 2D FSE | Diffusion-weighted imaging* |
|------------------------------------------------------------------------------------------------------------|-------------------------------|-------------------------|-------|--------------------|-----------------------------|
| <b>Training and internal testing center: Siemens MAGNETOM Skyra 3.0 Tesla (18-channel body array coil)</b> |                               |                         |       |                    |                             |
| Repetition time (ms)                                                                                       | 81                            | 3.95                    |       | 2160               | 5600                        |
| Echo time (ms)                                                                                             | 2.72/1.4                      | 1.92                    |       | 100                | 68                          |
| Echo spacing (ms)                                                                                          | /                             | /                       |       | 8.3                | 0.7                         |
| Echo chain length                                                                                          | /                             | /                       |       | 25                 | 49                          |
| Number of echoes                                                                                           | 2                             | 1                       |       | 1                  | 1                           |
| Flip angle (°)                                                                                             | 70                            | 9                       |       | 160                | 90                          |
| Section thickness (mm)                                                                                     | 6                             | 2.5                     |       | 6                  | 6                           |
| Spacing (mm)                                                                                               | 1.8                           | -                       |       | 1.8                | 1.8                         |
| Matrix size                                                                                                | 352×286                       | 352×256                 |       | 320×288            | 100×76                      |
| Field of view (mm <sup>2</sup> )                                                                           | 400×325                       | 400×296                 |       | 433×433            | 380×289                     |
| Acquisition time (s)                                                                                       | 24                            | 14                      |       | 36                 | 233                         |
| Fat suppression                                                                                            | No                            | Yes                     |       | Yes                | Yes                         |
| <b>Training and internal testing center: Siemens Avanto 1.5 Tesla (30-channel body anterior coil)</b>      |                               |                         |       |                    |                             |
| Repetition time (ms)                                                                                       | 72                            | 5.41                    |       | 2530               | 3600                        |
| Echo time (ms)                                                                                             | 4.92/2.22                     | 2.39                    |       | 84                 | 88                          |
| Echo spacing (ms)                                                                                          | /                             | /                       |       | 7.6                | 0.69                        |
| Echo chain length                                                                                          | /                             | /                       |       | 29                 | /                           |
| Number of echoes                                                                                           | 2                             | 1                       |       | 1                  | 1                           |
| Flip angle (°)                                                                                             | 70                            | 10                      |       | 150                | 90                          |
| Section thickness (mm)                                                                                     | 7                             | 2.5                     |       | 7                  | 7                           |
| Spacing (mm)                                                                                               | 7.8                           | -                       |       | 7.8                | 7.8                         |
| Matrix size                                                                                                | 256×187                       | 320×152                 |       | 256×187            | 192×115                     |
| Field of view (mm <sup>2</sup> )                                                                           | 300×370                       | 287×417                 |       | 326×380            | 277×370                     |
| Acquisition time (s)                                                                                       | 16                            | 15                      |       | 47                 | 92                          |
| Fat suppression                                                                                            | No                            | Yes                     |       | Yes                | Yes                         |
| <b>Training and internal testing center: Siemens TrioTim 3.0 Tesla (8-channel body anterior coil)</b>      |                               |                         |       |                    |                             |
| Repetition time (ms)                                                                                       | 180                           | 4.03                    |       | 2700               | 5900                        |
| Echo time (ms)                                                                                             | 3.67/2.2                      | 1.39                    |       | 95                 | 76                          |
| Echo spacing (ms)                                                                                          | /                             | /                       |       | 7.27               | 0.69                        |
| Echo chain length                                                                                          | /                             | /                       |       | 29                 | /                           |
| Number of echoes                                                                                           | 2                             | 1                       |       | 1                  | 1                           |
| Flip angle (°)                                                                                             | 65                            | 9                       |       | 140                | 90                          |
| Section thickness (mm)                                                                                     | 6                             | 2.4                     |       | 6                  | 6                           |
| Spacing (mm)                                                                                               | 7.8                           | -                       |       | 7.8                | 7.8                         |
| Matrix size                                                                                                | 256×131                       | 320×112                 |       | 320×150            | 192×115                     |
| Field of view (mm <sup>2</sup> )                                                                           | 295×450                       | 250×500                 |       | 272×464            | 294×393                     |

|                      |    |     |     |     |
|----------------------|----|-----|-----|-----|
| Acquisition time (s) | 18 | 17  | RG  | 245 |
| Fat suppression      | No | Yes | Yes | Yes |

**Training and internal testing center: GE Discovery 750w 3.0 Tesla (16-channel phased-array torsor coil)**

|                                  |         |          |         |           |
|----------------------------------|---------|----------|---------|-----------|
| Repetition time (ms)             | 150     | 4.1      | 6315    | 9230      |
| Echo time (ms)                   | 2.5/1.3 | 1.9      | 78      | Minimum   |
| Echo spacing (ms)                | /       | /        | 5.7     | 0.5       |
| Echo chain length                | /       | /        | 28      | /         |
| Number of echoes                 | 2       | 1        | 1       | 1         |
| Flip angle (°)                   | 70      | 15       | 111     | 90        |
| Section thickness (mm)           | 6       | 2        | 6       | 6         |
| Spacing (mm)                     | 2       | -        | 2       | 2         |
| Matrix size                      | 288×192 | 512×512  | 288×244 | 128 × 128 |
| Field of view (mm <sup>2</sup> ) | 420×420 | 380× 300 | 360×280 | 360× 380  |
| Acquisition time (s)             | 31      | 15       | RG      | RG        |
| Fat suppression                  | No      | Yes      | Yes     | Yes       |

**Training and internal testing center: GE SIGNA™ Premier 3.0 Tesla (30-channel body anterior coil)**

|                                  |         |         |         |         |
|----------------------------------|---------|---------|---------|---------|
| Repetition time (ms)             | 146.8   | 3.2     | 2200    | 5000    |
| Echo time (ms)                   | 2.3/1.1 | 1.4     | 85      | Minimum |
| Echo spacing (ms)                | /       | /       | 6.7     | 0.5     |
| Echo chain length                | /       | /       | 17      | /       |
| Number of echoes                 | 2       | 1       | 1       | 1       |
| Flip angle (°)                   | 55      | 15      | 111     | 90      |
| Section thickness (mm)           | 7       | 2.4     | 7       | 7       |
| Spacing (mm)                     | 2       | -       | 2       | 2       |
| Matrix size                      | 320×192 | 320×240 | 320×224 | 120×240 |
| Field of view (mm <sup>2</sup> ) | 342×380 | 380×380 | 304×380 | 380×380 |
| Acquisition time (s)             | 16      | 15      | 47      | RG      |
| Fat suppression                  | No      | Yes     | Yes     | Yes     |

**Training and internal testing center: GE SIGNA™ Architect 3.0 Tesla (30-channel body anterior coil)**

|                                  |         |         |         |         |
|----------------------------------|---------|---------|---------|---------|
| Repetition time (ms)             | Auto    | 3.6     | 2100    | Auto    |
| Echo time (ms)                   | 2.3/1.1 | 1.6     | 80      | Minimum |
| Echo spacing (ms)                | /       | /       | 6.3     | 0.7     |
| Echo chain length                | /       | /       | 28      | /       |
| Number of echoes                 | 2       | 1       | 1       | 1       |
| Flip angle (°)                   | 55      | 15      | 111     | 90      |
| Section thickness (mm)           | 7       | 1.5     | 7       | 7       |
| Spacing (mm)                     | 2       | 1.05    | 2       | 2       |
| Matrix size                      | 288×160 | 288×224 | 320×320 | 160×128 |
| Field of view (mm <sup>2</sup> ) | 380×380 | 380×380 | 380×380 | 380×380 |
| Acquisition time (s)             | Auto    | 15-17   | 45      | RG      |
| Fat suppression                  | No      | Yes     | Yes     | Yes     |

---

**Training and internal testing center: Phillips Ingenia Elition X 3.0 Tesla (32-channel body anterior coil)**

---

|                                  |         |         |         |         |
|----------------------------------|---------|---------|---------|---------|
| Repetition time (ms)             | 148     | 4.2     | 1000    | 1665    |
| Echo time (ms)                   | 2.4/1.2 | 1.49    | 90      | 56      |
| Echo spacing (ms)                | /       | /       | 5.3     | /       |
| Echo chain length                | /       | /       | 33      | 53      |
| Number of echoes                 | 2       | 1       | 1       | 1       |
| Flip angle (°)                   | 50      | 10      | 90      | 90      |
| Section thickness (mm)           | 6       | 1.6     | 6       | 6       |
| Spacing (mm)                     | 1.5     | -       | 1.5     | 1.5     |
| Matrix size                      | 292×161 | 344×188 | 304×260 | 200×142 |
| Field of view (mm <sup>2</sup> ) | 380×282 | 380×281 | 380×380 | 380×301 |
| Acquisition time (s)             | 12      | 14      | 24      | 152     |
| Fat suppression                  | No      | Yes     | Yes     | Yes     |

---

**Training and internal testing center: uMR588 1.5 Tesla (6-channel body anterior coil)**

---

|                                  |          |         |         |         |
|----------------------------------|----------|---------|---------|---------|
| Repetition time (ms)             | 117.6    | 4.2     | 2600    | 3350    |
| Echo time (ms)                   | 4.7/2.27 | 1.88    | 99.2    | 77      |
| Echo spacing (ms)                | /        | /       | 6.2     | 0.73    |
| Echo chain length                | /        | /       | 31      | 45      |
| Number of echoes                 | 2        | 1       | 1       | 1       |
| Flip angle (°)                   | 60       | 10      | 90      | 90      |
| Section thickness (mm)           | 6.5      | 2.5     | 6.5     | 6.5     |
| Spacing (mm)                     | 1.3      | -       | 1.5     | 10      |
| Matrix size                      | 256×174  | 256×154 | 256×168 | 128×92  |
| Field of view (mm <sup>2</sup> ) | 320×400  | 255×400 | 427×320 | 320×400 |
| Acquisition time (s)             | 29       | 13      | 39      | RG      |
| Fat suppression                  | No       | Yes     | Yes     | Yes     |

---

**External testing center: Siemens MAGNETOM Vida 3.0 T (18-channel body array coil)**

---

|                                  |           |           |         |         |
|----------------------------------|-----------|-----------|---------|---------|
| Repetition time (ms)             | 4.1       | 4.1       | 3000    | 6800    |
| Echo time (ms)                   | 1.31/2.54 | 1.31/2.54 | 92      | 59      |
| Flip angle (°)                   | 12        | 12        | 90      | 90      |
| Section thickness (mm)           | 3.0       | 3.0       | 5       | 5       |
| Spacing (mm)                     | 0.6       | 0.6       | 1.25    | 1.25    |
| Matrix size                      | 320×203   | 320×203   | 320×74  | 140×112 |
| Field of view (mm <sup>2</sup> ) | 344×380   | 344×380   | 400×400 | 320×400 |
| Acquisition time (s)             | 18        | 18        | 306     | 188     |
| Fat suppression                  | No        | Yes       | Yes     | Yes     |

---

**External testing center: Siemens MAGNETOM Skyra 3.0 T (18-channel body array coil)**

---

|                        |          |         |         |        |
|------------------------|----------|---------|---------|--------|
| Repetition time (ms)   | 81       | 3.95    | 2160    | 5600   |
| Echo time (ms)         | 2.72/1.4 | 1.92    | 100     | 68     |
| Flip angle (°)         | 70       | 9       | 160     | 90     |
| Section thickness (mm) | 6        | 2.5     | 6       | 6      |
| Spacing (mm)           | 1.8      | -       | 1.8     | 1.8    |
| Matrix size            | 352×286  | 352×256 | 320×288 | 100×76 |

|                                                                                            |         |         |         |         |
|--------------------------------------------------------------------------------------------|---------|---------|---------|---------|
| Field of view (mm <sup>2</sup> )                                                           | 400×325 | 400×296 | 433×433 | 380×289 |
| Acquisition time (s)                                                                       | 24      | 14      | 36      | 233     |
| Fat suppression                                                                            | No      | Yes     | Yes     | Yes     |
| <b>External testing center: Siemens MAGNETOM Prisma 3.0 T (18-channel body array coil)</b> |         |         |         |         |
| Repetition time (ms)                                                                       | 4.5     | 4.0     | 3000    | 3580    |
| Echo time (ms)                                                                             | 2.5/1.1 | 1.7     | 75      | 56      |
| Flip angle (°)                                                                             | 15      | 15      | 180     | 180     |
| Section thickness (mm)                                                                     | 2.3     | 2.3     | 5       | 5       |
| Spacing (mm)                                                                               | 0       | 0       | 1       | 1       |
| Matrix size                                                                                | 320×177 | 320×180 | 256×256 | 128×88  |
| Field of view (mm <sup>2</sup> )                                                           | 380×420 | 380×420 | 420×420 | 420×420 |
| Acquisition time (s)                                                                       | 14      | 14      | 225     | 236     |
| Fat suppression                                                                            | No      | Yes     | Yes     | Yes     |
| <b>External testing center: Philips Achieva 1.5 T (8-channel body anterior coil)</b>       |         |         |         |         |
| Repetition time (ms)                                                                       | 90.7    | 3.9     | 1354    | 1144    |
| Echo time (ms)                                                                             | 4.6/2.3 | 1.86    | 70      | 59      |
| Flip angle (°)                                                                             | 80      | 10      | 90      | 90      |
| Section thickness (mm)                                                                     | 7       | 4       | 7       | 7       |
| Spacing (mm)                                                                               | 1       | -       | 1       | 1       |
| Matrix size                                                                                | 280×229 | 272×221 | 252×225 | 192×189 |
| Field of view (mm <sup>2</sup> )                                                           | 375×304 | 375×295 | 375×298 | 375×302 |
| Acquisition time (s)                                                                       | 18.3    | 16.7    | 120     | 126     |
| Fat suppression                                                                            | No      | Yes     | Yes     | Yes     |
| <b>External testing center: uMR780 3.0 T (12-channel body anterior coil)</b>               |         |         |         |         |
| Repetition time (ms)                                                                       | 147.9   | 3.4     | 2140    | 4000    |
| Echo time (ms)                                                                             | 2.9/1.5 | 1.6     | 103.3   | 69      |
| Flip angle (°)                                                                             | 70      | 10      | 100     | 90      |
| Section thickness (mm)                                                                     | 6.5     | 4.5     | 6.5     | 6.5     |
| Spacing (mm)                                                                               | 1.3     | 1.5     | 1.3     | 1.3     |
| Matrix size                                                                                | 272×174 | 320×204 | 320×202 | 128×101 |
| Field of view (mm <sup>2</sup> )                                                           | 400×320 | 400×300 | 380×300 | 380×300 |
| Acquisition time (s)                                                                       | 32      | 15      | 228     | 147     |
| Fat suppression                                                                            | No      | Yes     | Yes     | Yes     |

2D, two-dimensional; 3D, three-dimensional; FSE, fast spin-echo; GRE, gradient recall echo; IP, in-phase; MRI, magnetic resonance imaging; OP, opposed-phase; RG, respiratory gating.

\*Images were acquired under free breath.

## **Supplementary Material 2: Assessment of image artifact**

Radiologist 1 (with seven years of experience in liver MRI) assessed the degree of image artifact on the testing dataset with a five-point scale [1]: 1 = extensive artifact and images nondiagnostic; 2 = severe artifact but images still interpretable; 3 = moderate artifact with some but no severe effect on diagnostic quality; 4 = minimal artifact with no effect on diagnostic quality; 5 = no artifact. Score 5 was regarded as no artifact, while score 3 and 4 were regarded as minor artifact.

[1] Davenport MS, Viglianti BL, Al-Hawary MM et al (2013) Comparison of acute transient dyspnea after intravenous administration of gadoxetate disodium and gadobenate dimeglumine: effect on arterial phase image quality. *Radiology* 266:452-461



### Supplementary Material 3: Image co-registration

Image co-registration ensured that the selected original MR images were consistent across all sequences. During image preprocessing, the images of different sequences were first registered to the portal venous phase images using a three-dimensional (3D) rigid registration network [2]. The multi-sequence liver registration network was used to establish spatial correspondence across different sequences of the same patient. The inputs of the registration network were the fixed and moving images, in which portal venous phase images were the fixed images and other images were the moving images. To improve the robustness and accuracy of the registration network, both the original images and the liver mask served as the inputs. The region of interest and initial displacement position for the registration network were roughly determined based on the liver mask. Finally, a linear transformation matrix was obtained as the spatial transformation relationship of the two input sequences (fixed and moving images) by the registration module. The registration accuracy was evaluated by the Dice coefficient and the average surface distance (ASD) between transformed moving label and the target label (**Table S2**).

[2] Yaniv Z, Lowekamp BC, Johnson HJ, Beare R (2018) SimpleITK Image-Analysis Notebooks: a Collaborative Environment for Education and Reproducible Research. *J Digit Imaging* 31:290-303

**Table S2** The Dice and ASD results of 3D image registration network

|       | Dice  | ASD (mm) |
|-------|-------|----------|
| T2WI  | 0.891 | 3.27     |
| DWI   | 0.883 | 3.61     |
| IP/OP | 0.907 | 3.08     |
| Pre   | 0.932 | 2.32     |
| AP    | 0.937 | 1.86     |
| PVP   | /     | /        |
| DP    | 0.945 | 1.71     |

Note.—3D, three-dimensional; AP, arterial phase; ASD, average surface distance; DP, delayed phase; DWI, diffusion-weighted imaging; IP, in-phase; OP, opposed-phase; Pre, pre-contrast T1-weighted imaging; PVP, portal venous phase; T2WI, T2-weighted imaging

## Supplementary Material 4: Liver segmentation

The input liver mask, formed from liver segmentation, helped the model to pay more attention to the liver area and reduce information redundancy of original images. Liver segmentation was performed based on a well-established CNN framework, which has been described in detail in our previous publication [3]. In brief, the outline of the liver was automatically extracted from each sequence using a 3D segmentation framework to form the liver mask. In this study, a novel one-to-multiple unsupervised domain adaptation (OMUDA) framework, composed by a One-to-Multiple Domain Generation (OMDG) framework and a segmentation network, was proposed to segment multiple abdominal organs including liver from a range of MRI sequences by leveraging annotations of some existing annotated CT images, thereby avoiding the high cost of annotating target MR sequences. The whole framework is illustrated in **Figure S1**, and it consisted of two stages: CT-to-Multi-sequence MRI translation (Image Translation) and training with the translated target modality images (Segmentation). The former aimed to train a generator which translated a CT image to its corresponding MR images with multiple sequences simultaneously. The latter employed the generated multi-sequence MR images and the annotations of their corresponding source CT images to train segmentation networks, where marginal loss was used to fully utilize the samples from different datasets and handling this partial label learning problem. 3D MR images were fed into the model and the corresponding liver segmentations were obtained.

For implementation details, model hyperparameters were as follows: in the OMDG framework, the number of output branches of mapping network, style encoder and discriminator was 10, which equaled to the number of used sequences. Adam optimizer was utilized and the initial learning rates for the mapping network and other networks were  $1e-6$  and  $1e-4$ , respectively. The batch size was 8 and the maximum iteration was set to 80000. Other hyperparameters were set the same as those in StarGAN v2 [4]. In the segmentation stage, 3D nnUNet [5] was used as the network structure in our study. Besides, the batch size was set to 8 and the nnUNet built-in postprocessing was discarded. The other settings were kept default.

The Dice Similarity Coefficient (DSC) and 95% Hausdorff distance ( $HD_{95}$ ) were adopted to evaluate the segmentation performance of our OMUDA framework on the internal testing set (**Table S3**).

Comparison study was performed between our OMUDA and other state-of-the-art unsupervised synthesis frameworks: SIFA [6], CycleGAN [7], MUNIT [8] and StarGAN v2 [4]. The segmentation results of these methods in terms of Dice Similarity Coefficient (DSC) and 95% Hausdorff Distance ( $HD_{95}$ ) are shown in **Figure S2**, which indicates that OMUDA outperformed SIFA, MUNIT and StarGAN v2 by a large margin for multiple organs (including liver) in multiple MRI sequences.

In addition, we assessed the robustness of our OMUDA segmentation networks on two external datasets: Multi-Modality Abdominal Multi-Organ Segmentation Challenge 2022 (AMOS22) and Combined Healthy Abdominal Organ Segmentation (CHAOS). OMUDA also achieved satisfactory

results that the average DSCs for multiple sequences and organs on the AMOS22 dataset and the CHAOS dataset were 82.66% (96.01% for liver) and 91.38%, respectively.

After image co-registration, the liver mask was similar across different sequences. Therefore, we only input liver mask from portal venous phase images into the model when developing CNN models using two- or three-sequence combinations. For one-sequence model, the corresponding liver mask of the target sequence was selected.

[3] Xu X, Chen Y, Wu J et al (2023) A novel one-to-multiple unsupervised domain adaptation framework for abdominal organ segmentation. *Med Image Anal* 88:102873

[4] Choi, Y., Uh, Y., Yoo, J., Ha, J.W., 2020. Stargan v2: Diverse image synthesis for multiple domains. In: 2020 IEEE/CVF Conference on Computer Vision and Pattern Recognition. CVPR.

[5] Isensee, F., Jaeger, P. F., Kohl, S. A., Petersen, J., & Maier-Hein, K. H. (2021). nnU-Net: a self-configuring method for deep learning-based biomedical image segmentation. *Nature methods*, 18(2), 203-211.

[6] Chen, C., Dou, Q., Chen, H., Qin, J., Heng, P.A., 2020. Unsupervised bidirectional cross-modality adaptation via deeply synergistic image and feature alignment for medical image segmentation. *IEEE Trans. Med. Imaging* 39 (7), 2494–2505.

[7] Zhu, J.Y., Park, T., Isola, P., Efros, A.A., 2017. Unpaired image-to-image translation using cycle-consistent adversarial networks. In: *Proceedings of the IEEE International Conference on Computer Vision*. pp. 2223–2232.

[8] Huang, X., Liu, M.Y., Belongie, S., Kautz, J., 2018. Multimodal unsupervised image-to-image translation. In: *Proceedings of the European Conference on Computer Vision*. ECCV, pp. 172–189.

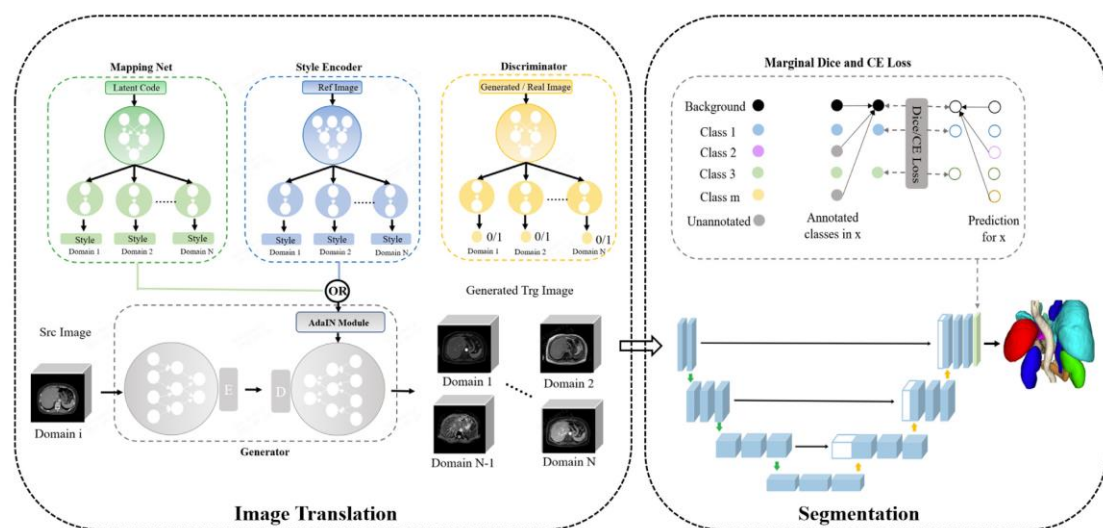

**Figure S1** The one-to-multiple unsupervised domain adaptation (OMUDA) framework.



**Table S3** Quantitative liver segmentation results of OMUDA framework on the internal testing set

|      | DSC   | HD <sub>95</sub> (mm) |
|------|-------|-----------------------|
| T2WI | 0.878 | 16.40                 |
| DWI  | 0.871 | 14.62                 |
| IP   | 0.915 | 7.83                  |
| OP   | 0.944 | 5.25                  |
| Pre  | 0.964 | 3.21                  |
| AP   | 0.954 | 3.98                  |
| PVP  | 0.964 | 3.29                  |
| DP   | 0.965 | 3.13                  |

Note.—AP, arterial phase; DP, delayed phase; DSC, Dice Similarity Coefficient; DWI, diffusion-weighted imaging; HD<sub>95</sub>, 95% Hausdorff distance; IP, in-phase; OP, opposed-phase; Pre, pre-contrast T1-weighted imaging; PVP, portal venous phase; T2WI, T2-weighted imaging

## Supplementary Material 5: CNN model training

Five-fold cross-validation strategy was applied to the training dataset during CNN training, in which the training dataset was further separated into derivation and validation sets for each fold. Five models were trained and the corresponding network weights with the best AUC value on the validation set were saved. The patients' predicted probabilities averaged from five selected models were used to calculate the evaluation metrics.

For CNN architecture, the filter size and stride for each convolution operation were the same as the standard ResNet-18 backbone (**Fig.1**), and the same padding strategy was used to ensure same spatial dimensions of the input tensor after convolution operation. One max pooling operation was performed after the first convolutional layer, and one average pooling was performed before the fully connected layer. The Kaiming initialization method was used to initialize the weights. Batch normalization and dropout strategy were used to tackle the challenges of long training time and overfitting, with batch size set to 32 and the dropout rate as 0.3.

During data loading of CNN training, balanced cirrhosis and non-cirrhosis samples were fed into the network to overcome the imbalance problem among two groups. The network was trained using the Adam optimizer with an initial learning rate (LR) of  $1e-3$ , and the LR was updated by ReduceLROnPlateau schedule with a patience of 10 epochs and a decay factor of 0.1. Weight decay was set to  $1e-5$ . Binary cross-entropy loss with label smoothing ( $\delta=0.2$ ) was applied as loss function. Batch size was set to 32 and dropout rate was 0.3. For above hyperparameter optimization, manual search technique was used during CNN training. The network was trained for a maximum of 500 epochs or until the early stopping condition had been met, storing the network weights with the best validation AUC value. In our study, early stopping with a patience of 20 epochs was performed when the AUC value on the validation set stopped improving, which was applied to further minimize overfitting.

During CNN training, learning curve was plotted to diagnose the overfitting over the experience of loss function (**Figure S3**). The loss curves of derivation and validation sets were almost parallel to each other, indicating that the CNN model generalized well on the validation set.

The averaged total training time of five-fold cross-validation experiments was 75 minutes, which was related to the model size, the number of workers during data loading, and other factors.

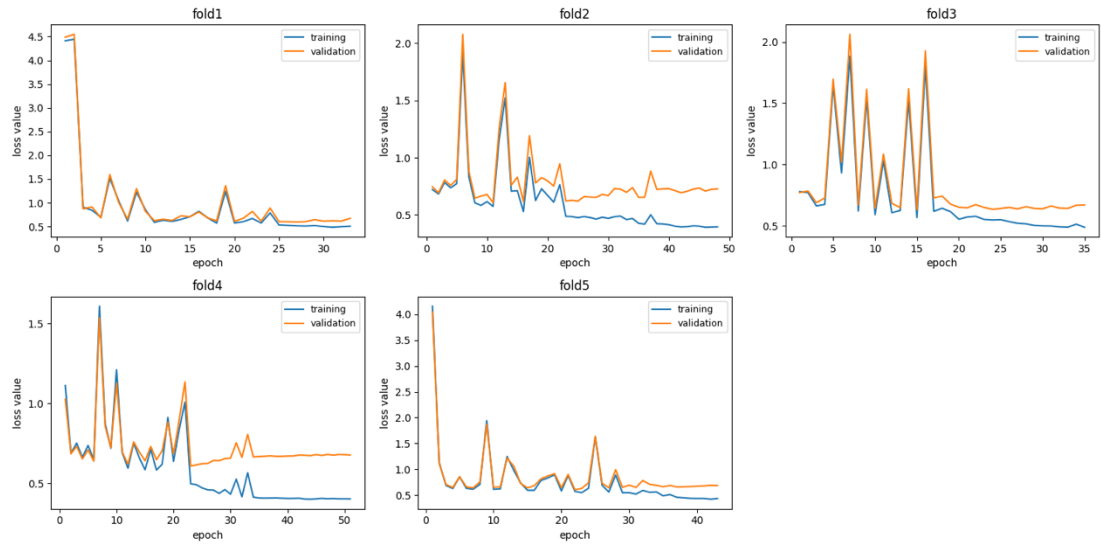

**Figure S3** Loss curves of derivation and validation sets of five-fold cross-validation experiments.

## **Supplementary Material 6: Development of the combined model**

Based on the training dataset, the combined model was established by integrating the CNN model with relevant clinical characteristics (i.e., age, sex, platelet count, total bilirubin, albumin, aspartate aminotransferase [AST], alanine aminotransferase [ALT], alkaline phosphatase [ALP], gamma-glutamyl transferase [GGT], international normalized ratio [INR], hepatitis B surface antigen, hepatitis B surface antibody, hepatitis B e-antigen, hepatitis B e-antibody, hepatitis B core antibody, hepatitis B virus status [present vs. absent], and hepatitis C virus status [present vs. absent]).



**Table S4** Performance of CNN models with different combinations of MRI sequences on the training set

|                 | Pre              | T2WI             | PVP              | Pre + T2WI       | Pre + PVP        | T2WI + PVP       | Pre + T2WI + PVP |
|-----------------|------------------|------------------|------------------|------------------|------------------|------------------|------------------|
| Cut-off §       | >0.43164         | >0.53314         | >0.42059         | >0.54343         | >0.45991         | >0.31279         | >0.38754         |
| AUC             | 0.90 (0.88-0.92) | 0.89 (0.86-0.91) | 0.93 (0.91-0.94) | 0.94 (0.92-0.96) | 0.94 (0.92-0.96) | 0.93 (0.91-0.95) | 0.95 (0.93-0.96) |
| <i>p</i> value* | <0.001           | <0.001           | 0.008            | /                | 0.93             | 0.09             | 0.21             |
| Sensitivity     | 82% (79%-85%)    | 82% (79%-85%)    | 82% (78%-85%)    | 87% (84%-90%)    | 84% (80%-87%)    | 87% (84%-90%)    | 83% (80%-86%)    |
| <i>p</i> value* | 0.002            | 0.009            | <0.001           | /                | 0.01             | 1.00             | 0.005            |
| Specificity     | 84% (79%-88%)    | 81% (76%-85%)    | 90% (86%-93%)    | 89% (85%-92%)    | 92% (88%-95%)    | 85% (81%-89%)    | 93% (90%-96%)    |
| <i>p</i> value* | 0.009            | 0.001            | 0.85             | /                | 0.11             | 0.06             | 0.02             |
| PPV             | 90% (87%-92%)    | 88% (86%-90%)    | 93% (91%-95%)    | 93% (91%-95%)    | 95% (92%-96%)    | 91% (89%-93%)    | 95% (93%-97%)    |
| <i>p</i> value* | 0.002            | 0.001            | 0.99             | /                | 0.12             | 0.04             | 0.03             |
| NPV             | 73% (69%-76%)    | 72% (68%-76%)    | 74% (70%-77%)    | 80% (76%-83%)    | 76% (72%-79%)    | 79% (75%-83%)    | 76% (72%-79%)    |
| <i>p</i> value* | <0.001           | <0.001           | <0.001           | /                | 0.03             | 0.71             | 0.02             |
| Accuracy        | 83% (80%-85%)    | 82% (79%-84%)    | 85% (82%-87%)    | 88% (85%-90%)    | 87% (84%-89%)    | 86% (84%-89%)    | 87% (84%-89%)    |
| <i>p</i> value* | <0.001           | <0.001           | 0.005            | /                | 0.31             | 0.28             | 0.39             |
| True positive   | 438              | 439              | 437              | 465              | 446              | 465              | 443              |
| False positive  | 50               | 59               | 32               | 34               | 25               | 45               | 21               |
| False negative  | 96               | 95               | 97               | 69               | 88               | 69               | 91               |
| True negative   | 256              | 247              | 274              | 272              | 281              | 261              | 285              |

Note.—Data in parentheses are 95% confidence interval. AUC, area under the receiver operating characteristic curve; CNN, convolutional neural network; NPV, negative predictive value; PPV, positive predictive value; Pre, pre-contrast phase; PVP, portal venous phase; T2WI, T2-weighted imaging

§Cut-offs represent the model outputs of the CNN models.

\**P* values were calculated in comparison to the model of Pre + T2WI. AUCs were compared using Delong test. PPVs and NPVs were compared using the weighted generalized score test proposed by Kosinski, while sensitivities, specificities, and accuracies were compared using McNemar's test.

**Table S5** Multicollinearity test based on variance inflation factor

| Variables                                          | VIF   |
|----------------------------------------------------|-------|
| CNN model-based cirrhosis probability <sup>§</sup> | 1.099 |
| Age <sup>§</sup>                                   | 1.052 |
| Sex                                                | 1.072 |
| Platelet count <sup>§</sup>                        | 1.149 |
| Total bilirubin <sup>§</sup>                       | 1.345 |
| Albumin <sup>§</sup>                               | 1.277 |
| AST <sup>§</sup>                                   | 3.454 |
| ALT <sup>§</sup>                                   | 3.439 |
| ALP <sup>§</sup>                                   | 2.204 |
| GGT <sup>§</sup>                                   | 2.144 |
| INR <sup>§</sup>                                   | 1.433 |
| hepatitis B surface antigen                        | 1.966 |
| hepatitis B surface antibody                       | 1.429 |
| hepatitis B e-antigen                              | 1.294 |
| hepatitis B e-antibody                             | 1.442 |
| hepatitis B core antibody                          | /     |
| hepatitis B virus status (present vs. absent)      | 1.365 |
| hepatitis C virus status (present vs. absent)      | 1.068 |

ALP, alkaline phosphatase; ALT, alanine aminotransferase; AST, aspartate aminotransferase; CNN, convolutional neural network; GGT, gamma-glutamyl transferase; INR, international normalized ratio; VIF, variance inflation factor

<sup>§</sup>Continuous variables were normalized with z-score.

**Table S6** Importance score of variables in the combined models

| Fold 1          |                  | Fold 2          |                  | Fold 3          |                  | Fold 4          |                  | Fold 5         |                  |
|-----------------|------------------|-----------------|------------------|-----------------|------------------|-----------------|------------------|----------------|------------------|
| Variables       | Importance score | Variables       | Importance score | Variables       | Importance score | Variables       | Importance score | Variables      | Importance score |
| Probability     | 0.43             | Probability     | 0.32             | Probability     | 0.35             | Probability     | 0.60             | Probability    | 0.46             |
| Platelet count  | 0.13             | Platelet count  | 0.15             | Platelet count  | 0.15             | Platelet count  | 0.10             | Platelet count | 0.13             |
| INR             | 0.07             | INR             | 0.09             | INR             | 0.07             | INR             | 0.04             | INR            | 0.06             |
| GGT             | 0.05             | GGT             | 0.05             | GGT             | 0.06             | GGT             | 0.04             | GGT            | 0.04             |
| Albumin         | 0.05             | Albumin         | 0.06             | Albumin         | 0.06             | Albumin         | 0.04             | Albumin        | 0.06             |
| ALP             | 0.05             | ALP             | 0.05             | ALP             | 0.05             | Age             | 0.03             | Age            | 0.04             |
| Total bilirubin | 0.04             | Total bilirubin | 0.05             | Total bilirubin | 0.05             | Total bilirubin | 0.03             | AST            | 0.04             |
| ALT             | 0.04             | AST             | 0.05             | AST             | 0.05             | ALT             | 0.03             | ALT            | 0.04             |

ALP, alkaline phosphatase; ALT, alanine aminotransferase; AST, aspartate aminotransferase; probability, convolutional neural network model-based cirrhosis probability; GGT, gamma-glutamyl transferase; INR, international normalized ratio

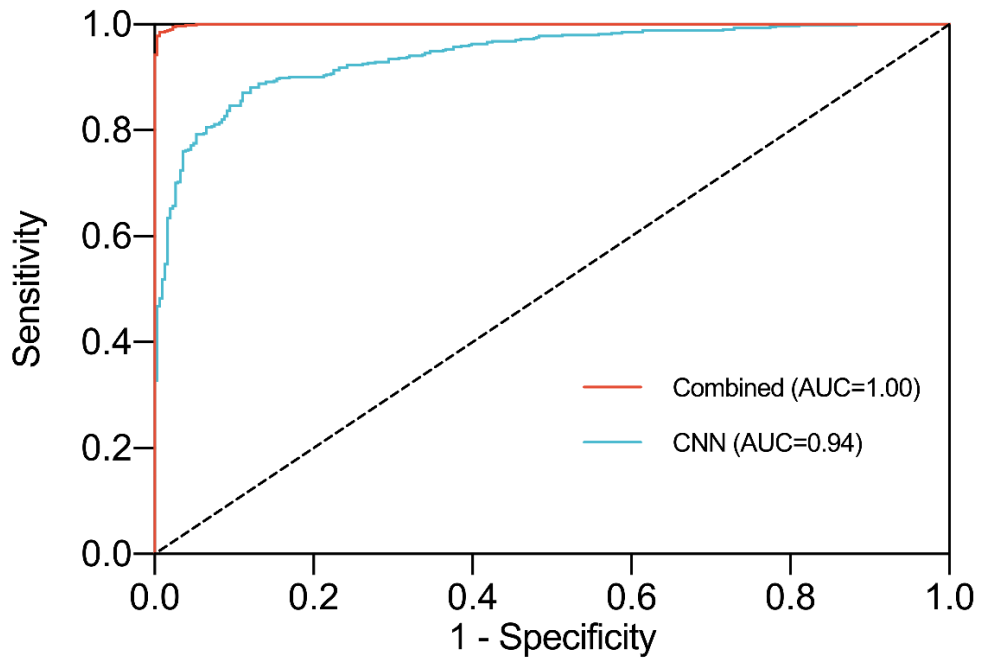

**Figure S4** Receiver operating characteristic curves for diagnosis of cirrhosis on the training set. AUC, area under the receiver operating characteristic curve; CNN, convolutional neural network

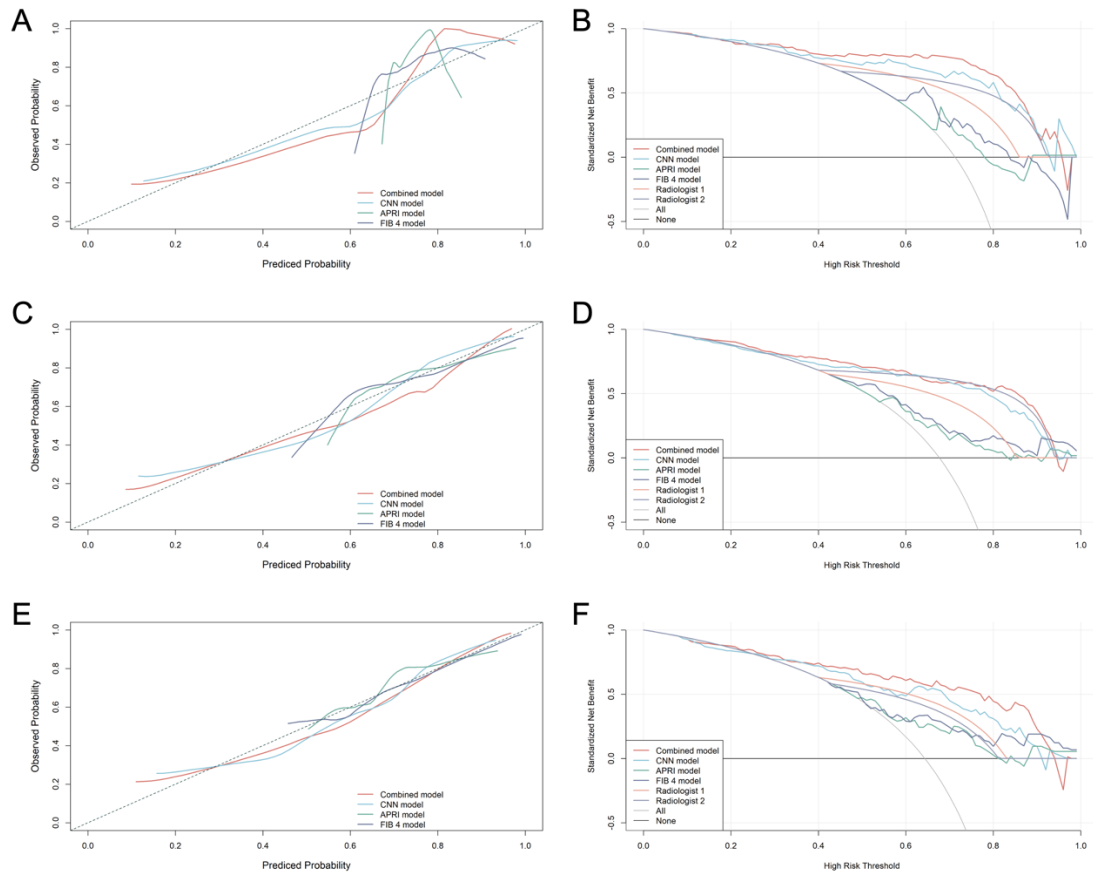

**Figure S5** Calibration curves (A, C, and E) and decision curves (B, D, and F) for diagnosis of cirrhosis on the internal testing set 1 (A, B), internal testing set 2 (C, D) and external testing set (E, F). In decision curves, Y-axis is the net benefit, which describes the difference between the proportion of true positives and that of false positives weighted by the odds of the selected threshold for high-risk designation. X-axis represents the threshold probability. The threshold probability for a disease at which a patient decides to pursue treatment is the point where the expected benefit of treatment is equal to the expected benefit of forgoing treatment. At a given threshold probability, the model with the higher net benefit is preferred. APRI, aminotransferase-to-platelet ratio index; CNN, convolutional neural network; FIB-4, fibrosis-4 index

**Table S7 Examples of possible reasons for false positive and false negative cases of the combined model on the testing sets**

| Cases          | Activation maps of CNN model                                                        | Diagnostic results |     |                  |                  | FIB-4 | APRI | PLT<br>( $\times 10^9/L$ ) | Possible reasons                                 |
|----------------|-------------------------------------------------------------------------------------|--------------------|-----|------------------|------------------|-------|------|----------------------------|--------------------------------------------------|
|                |                                                                                     | CNN<br>probability | CNN | Radiologist<br>1 | Radiologist<br>2 |       |      |                            |                                                  |
| False positive |                                                                                     |                    |     |                  |                  |       |      |                            |                                                  |
| Case 1         | 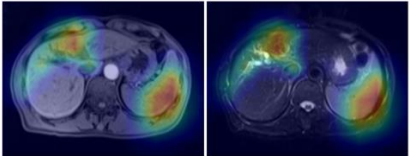   | 0.57               | 0   | 0                | 1                | 17.87 | 5.99 | 38                         | Platelet count decrease due to unknown reason    |
| Case 2         |    | 0.79               | 1   | 1                | 0                | 3.22  | 0.73 | 106                        | Unknown                                          |
| Case 3         |    | 0.67               | 1   | 1                | 0                | 2.78  | 1.16 | 93                         | Slight liver surface nodularity on MRI           |
| False negative |                                                                                     |                    |     |                  |                  |       |      |                            |                                                  |
| Case 1         |  | 0.23               | 0   | 0                | 0                | 2.14  | 0.90 | 163                        | Lesion in left lobe leading to left lobe atrophy |

|        |                                                                                     |      |   |   |   |      |      |     |                                |
|--------|-------------------------------------------------------------------------------------|------|---|---|---|------|------|-----|--------------------------------|
| Case 2 | 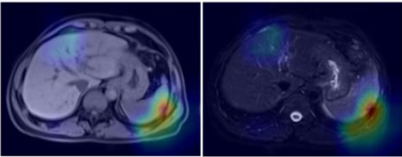   | 0.32 | 0 | 0 | 0 | 5.10 | 2.14 | 62  | No significant imaging feature |
| Case 3 |    | 0.38 | 0 | 1 | 1 | 1.49 | 0.46 | 159 | Unknown                        |
| Case 4 |    | 0.40 | 0 | 1 | 0 | 1.22 | 0.29 | 148 | Unknown                        |
| Case 5 |    | 0.38 | 0 | 0 | 0 | 2.09 | 0.62 | 234 | No significant imaging feature |
| Case 6 |   | 0.39 | 0 | 1 | 1 | 2.97 | 0.80 | 97  | Unknown                        |
| Case 7 |  | 0.43 | 0 | 0 | 0 | 1.53 | 0.58 | 165 | No significant imaging feature |

---

|        |                                                                                   |      |   |   |   |      |      |     |                                                           |
|--------|-----------------------------------------------------------------------------------|------|---|---|---|------|------|-----|-----------------------------------------------------------|
| Case 8 | 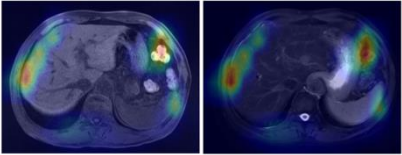 | 0.58 | 1 | 0 | 0 | 2.28 | 0.49 | 157 | No significant imaging feature<br>Normal lab test results |
|--------|-----------------------------------------------------------------------------------|------|---|---|---|------|------|-----|-----------------------------------------------------------|

---

APRI, aminotransferase-to-platelet ratio index; CNN, convolutional neural network; FIB-4, fibrosis-4 index; PLT, platelet count
